# Supplementary material for: Molecular Characterization of the First Alternavirus Identified in Fusarium oxysporum
Source: MDPI journal article supplement (doi:10.3390/v13102026), 2021-10-08
Supplement: s1 [file s1]

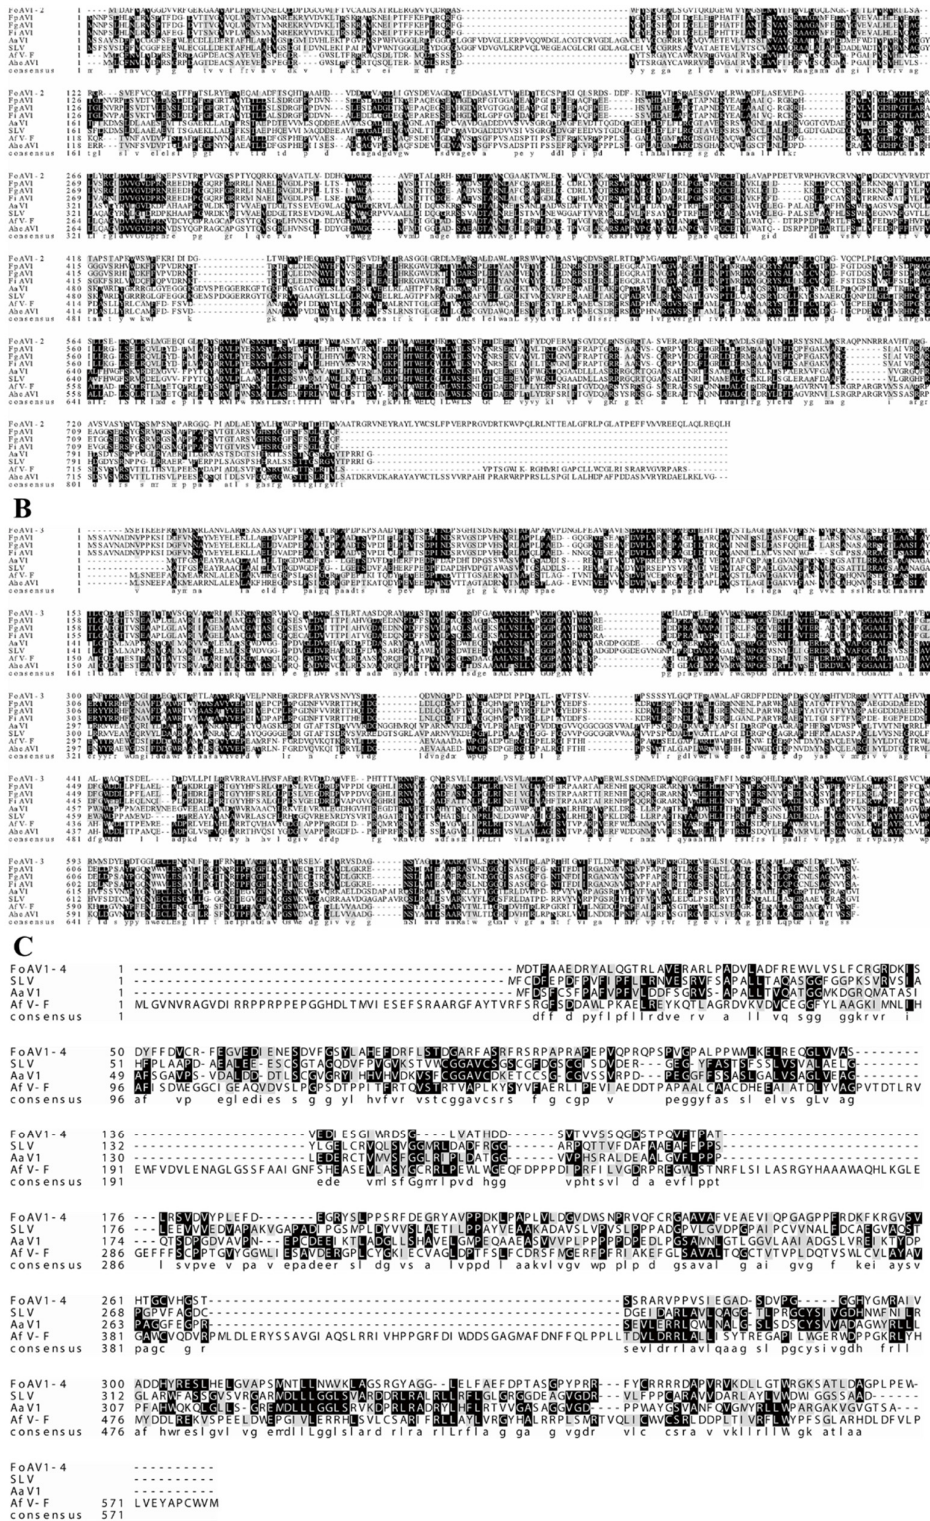

**Figure S1.** Multiple alignment of the ORF2(A), ORF3(B) and ORF4(C) amino acid motifs encoded by FoAV1 and other Alternaviridae family members, respectively.
