# Supplementary material for: Molecular Characterization of the First Alternavirus Identified in Fusarium oxysporum
Source: MDPI journal article supplement (doi:10.3390/v13102026), 2021-10-08
Supplement: s1 [file s1]

**Table S1.** A list of primers used in this study.

| Primer Name | Oligonucleotide sequence (5'- 3')                                   | Usage                                           |
|-------------|---------------------------------------------------------------------|-------------------------------------------------|
| RACE3RT     | CGATCGATCATGATGCAATGCNNNNN                                          | For initial sequence cloning                    |
| RACE3       | CGATCGATCATGATGCAATGC                                               |                                                 |
| FoAV1-1F    | ACTGCTAAGTGTCTCTCCCAATCCT                                           |                                                 |
| FoAV1-1R    | CAGGGAACAGACCAAACAAAGAAAG                                           |                                                 |
| FoAV1-2F    | TGACGGTTGTGGATGGATCTTC                                              |                                                 |
| FoAV1-2R    | ATACAGCAAACGCCTGGAAAGAGT                                            |                                                 |
| FoAV1-3F    | CGCCTTGTTTCTGTGCTTGCT                                               |                                                 |
| FoAV1-3R    | CACGCACAATACCCATCTCCG                                               |                                                 |
| FoAV1-4F    | TGGGGATGGATACTTTTGCTGCT                                             |                                                 |
| FoAV1-4R    | GACCGCCGCAACATATTCAAAA                                              |                                                 |
| pC2         | CGATCGATCATGATGCAATGC                                               | For terminal sequence cloning                   |
| pC3-T7loop  | p-GGATCCCGGGAATTCGGTAA<br>TACGACTCACTATATTTTATAGT<br>GAGTCGTATTA-OH |                                                 |
| FoAV1-1-A1  | TGTGGCTCTTGGGTGTT                                                   |                                                 |
| FoAV1-1-A2  | ACAGAATCAACCACCTCACAAG                                              |                                                 |
| FoAV1-1-S1  | TGTCAACCTGGATGCGTAATG                                               |                                                 |
| FoAV1-1-S2  | CGTGGGTAAAGACATCAACTGG                                              |                                                 |
| FoAV1-2-A1  | CCTTTTCCCCGAACCTCACAA                                               |                                                 |
| FoAV1-2-A2  | ATCCATCCACAACCGTCAGG                                                |                                                 |
| FoAV1-2-S1  | CTTTATTGGTGTTCCTTTCTCCG                                             |                                                 |
| FoAV1-2-S2  | GCCTACCTTTATTGGTGTTCCTT                                             |                                                 |
| FoAV1-3-A1  | CTTCCGTGACAACCAAGAGCAT                                              | Specific primers of the dsRNA1 segment of FoAV1 |
| FoAV1-3-A2  | TGGAACGGACCTGCCGACCCTGACA                                           |                                                 |
| FoAV1-3-S1  | AGACAGCGGCGAGGGTGAAAGC                                              |                                                 |
| FoAV1-3-S2  | ATAACAGACCTGATCCTTCGCAATA                                           |                                                 |
| FoAV1-4-A1  | ACGGCAGAACAGACTCACCAA                                               |                                                 |
| FoAV1-4-S1  | TTTGAATATGTTGCGGCGGT                                                |                                                 |
| FoAV1-4-S2  | CATGAACACTCTGCTTAAGTGGT                                             |                                                 |
| BH19-1-YZ-F | GACAATGCTCAATATGCTGCTAAAG                                           |                                                 |
| BH19-1-YZ-R | TCTTTCCACACCTTATGCGTTACT                                            |                                                 |
| BH19-2-YZ-F | TGAGGTTCGGGAAAAGGGT                                                 | Specific primers of the dsRNA2 segment of FoAV1 |
| BH19-2-YZ-R | TGACAGTGTGAAGCGTAGTGCG                                              |                                                 |
| BH19-3-YZ-F | GGAAGAGTTTCGTGCCTATATGGAC                                           | Specific primers of the dsRNA3 segment of FoAV1 |
| BH19-3-YZ-R | TTTCAGTTTATTGCCGCACGCT                                              |                                                 |
| BH19-4-YZ-F | TTCAAATACCAGGTCCATCGCT                                              | Specific primers of the dsRNA4 segment of FoAV1 |
| BH19-4-YZ-R | GGTCATGCCACATCGCACAGT                                               |                                                 |
